# Supplementary material
Source: MDPI journal article supplement (https://www.mdpi.com/2073-4395/12/2/312)
Supplement: s1 [file s1]

## Supplementary material

Table S1 Percentage composition of soil macroinvertebrate taxa by site and crop stage

| Taxonomic group |               | Crop stages |         |         |         |         |         | Sites |       |       | Overall |       |
|-----------------|---------------|-------------|---------|---------|---------|---------|---------|-------|-------|-------|---------|-------|
| Phyla           | Lower taxa    | Com-You     | Com-Har | Com-Fal | Shd-You | Shd-Har | Shd-Fal | Com   | Shd   | Uncul | Taxa    | Phyla |
| Annelida        | Oligochaeta   | 51.36       | 17.81   | 9.57    | 71.79   | 88.68   | 83.40   | 28.03 | 82.16 | 71.36 | 57.3    | 61.3  |
|                 | Hirudinea     | 3.11        | 4.05    | 7.45    | 5.64    | 1.13    | 7.23    | 4.62  | 4.46  | 0.47  | 4.0     |       |
| Mollusca        | Gastropoda    | 40.86       | 14.98   | 57.45   | 8.72    | 3.77    | 0.43    | 36.13 | 4.03  | 3.76  | 17.9    | 17.9  |
| Arthropoda      | Arachnida     | -           | 0.81    | 2.66    | 1.03    | 0.38    | -       | 1.01  | 0.43  | 1.88  | 0.9     | 20.8  |
|                 | Isopoda       | -           | 0.81    | -       | -       | -       | -       | 0.29  | -     | 3.29  | 0.6     |       |
|                 | Decapoda      | -           | -       | -       | -       | -       | -       | -     | -     | 0.47  | 0.1     |       |
|                 | Hymenoptera   | 0.39        | 0.40    | -       | 3.08    | 3.40    | 1.70    | 0.29  | 2.73  | 6.10  | 2.1     |       |
|                 | Coleoptera    | 1.95        | 49.80   | 18.09   | 3.59    | 0.75    | 5.53    | 23.41 | 3.17  | 6.57  | 12.4    |       |
|                 | Tabanidae     | 1.56        | 2.43    | -       | 5.13    | 1.13    | 0.43    | 1.45  | 2.01  | -     | 1.5     |       |
|                 | Dermaptera    | -           | 2.02    | -       | -       | 0.38    | -       | 0.72  | 0.14  | 1.88  | 0.6     |       |
|                 | Diplura       | 0.39        | 0.40    | -       | -       | -       | -       | 0.29  | -     | -     | 0.1     |       |
|                 | Chilopoda     | -           | -       | -       | -       | -       | -       | -     | -     | 0.94  | 0.1     |       |
|                 | Diplopoda     | -           | -       | -       | -       | -       | -       | -     | -     | 0.47  | 0.1     |       |
|                 | Ephemeroptera | -           | -       | 0.53    | -       | -       | -       | 0.14  | -     | -     | 0.1     |       |
|                 | Orthoptera    | 0.39        | -       | 2.13    | 0.51    | -       | 1.28    | 0.72  | 0.58  | 2.35  | 0.9     |       |
|                 | Blattodea     | -           | -       | -       | -       | -       | -       | -     | -     | 0.47  | 0.1     |       |
|                 | Odonata       | -           | 0.40    | 0.53    | -       | 0.38    | -       | 0.29  | 0.14  | -     | 0.2     |       |
|                 | Trichoptera   | -           | 5.67    | 1.06    | 0.51    | -       | -       | 2.31  | 0.14  | -     | 1.1     |       |
|                 | Stratiomyidae | -           | 0.40    | 0.53    | -       | -       | -       | 0.29  | -     | -     | 0.1     |       |

Sampling sites: Com (large-scale commercial paddies), Shd (smallholder paddies), Uncul (Natural wetland). Crop stages: You (young), Har (harvest/mature), Fal (fallow).

**Table S2.** Proportion of soil samples where macroinvertebrate taxa were encountered per site and crop stage.

| Taxa          | Crop stages |             |             |             |             |             | Sites   |         |                            | Overall |
|---------------|-------------|-------------|-------------|-------------|-------------|-------------|---------|---------|----------------------------|---------|
|               | Com-<br>You | Com-<br>Har | Com-<br>Fal | Shd-<br>You | Shd-<br>Har | Shd-<br>Fal | Co<br>m | Sh<br>d | Natura<br>l<br>wetlan<br>d |         |
| Oligochaeta   | 83.3        | 83.3        | 50.0        | 100.0       | 91.7        | 100.0       | 72.2    | 97.2    | 100.0                      | 86.9    |
| Hirudinea     | 33.3        | 50.0        | 66.7        | 33.3        | 16.7        | 66.7        | 50.0    | 38.9    | 8.3                        | 39.3    |
| Gastropoda    | 83.3        | 50.0        | 83.3        | 58.3        | 33.3        | 8.3         | 72.2    | 33.3    | 25.0                       | 48.8    |
| Arachnida     | -           | 8.3         | 25.0        | 16.7        | 8.3         | -           | 11.1    | 8.3     | 16.7                       | 10.7    |
| Isopoda       | -           | 8.3         | -           | -           | -           | -           | 2.8     | -       | 8.3                        | 2.4     |
| Decapoda      | -           | -           | -           | -           | -           | -           | -       | -       | 8.3                        | 1.2     |
| Hymenoptera   | 8.3         | 8.3         | -           | 16.7        | 16.7        | 8.3         | 5.6     | 13.9    | 25.0                       | 11.9    |
| Coleoptera    | 41.7        | 91.7        | 66.7        | 41.7        | 16.7        | 41.7        | 66.7    | 33.3    | 58.3                       | 51.2    |
| Tabanidae     | 16.7        | 25.0        | -           | 33.3        | 25.0        | 8.3         | 13.9    | 22.2    | -                          | 15.5    |
| Dermaptera    | -           | 33.3        | -           | -           | 8.3         | -           | 11.1    | 2.8     | 33.3                       | 10.7    |
| Diplura       | 8.3         | 8.3         | -           | -           | -           | -           | 5.6     | -       | -                          | 2.4     |
| Chilopoda     | -           | -           | -           | -           | -           | -           | -       | -       | 8.3                        | 1.2     |
| Diplopoda     | -           | -           | -           | -           | -           | -           | -       | -       | 8.3                        | 1.2     |
| Ephemeroptera | -           | -           | 8.3         | -           | -           | -           | 2.8     | -       | -                          | 1.2     |
| Orthoptera    | 8.3         | -           | 16.7        | 8.3         | -           | 16.7        | 8.3     | 8.3     | 25.0                       | 10.7    |
| Blattodea     | -           | -           | -           | -           | -           | -           | -       | -       | 8.3                        | 1.2     |
| Odonata       | -           | 8.3         | 8.3         | -           | 8.3         | -           | 5.6     | 2.8     | -                          | 3.6     |
| Trichoptera   | -           | 25.0        | 16.7        | 8.3         | -           | -           | 13.9    | 2.8     | -                          | 7.1     |
| Stratiomyidae | 8.3         | 8.3         | 8.3         | -           | -           | -           | 8.3     | -       | -                          | 3.6     |

Sampling sites: Com (large-scale commercial paddies), Shd (smallholder paddies), Uncul (Natural wetland). Crop stages: You (young), Har (harvest/mature), Fal (fallow).

**Table S3.** Soil characteristics (Mean  $\pm$ SE) per site and crop stage

| Variable | Unit of measure | Crop stages      |                  |                  |                  |                  |                  | Sites            |                  |                   | Overall          |
|----------|-----------------|------------------|------------------|------------------|------------------|------------------|------------------|------------------|------------------|-------------------|------------------|
|          |                 | Com-You          | Com-Har          | Com-Fal          | Shd-You          | Shd-Har          | Shd-Fal          | Com              | Shd              | Natural wetland   |                  |
| pH       |                 | 5.5 $\pm$ 0.27   | 5.43 $\pm$ 0.15  | 5.68 $\pm$ 0.13  | 5.62 $\pm$ 0.17  | 5.83 $\pm$ 0.13  | 5.98 $\pm$ 0.1   | 5.54 $\pm$ 0.11  | 5.81 $\pm$ 0.08  | 6.03 $\pm$ 0.11   | 5.73 $\pm$ 0.06  |
| SOM      | %               | 20.37 $\pm$ 2.78 | 15.56 $\pm$ 2.20 | 17.16 $\pm$ 2.10 | 22.37 $\pm$ 3.04 | 26.51 $\pm$ 4.58 | 30.19 $\pm$ 5.18 | 17.7 $\pm$ 1.38  | 26.36 $\pm$ 2.5  | 37.53 $\pm$ 3.74  | 24.24 $\pm$ 1.51 |
| N        | %               | 0.47 $\pm$ 0.03  | 0.39 $\pm$ 0.02  | 0.42 $\pm$ 0.03  | 0.52 $\pm$ 0.04  | 0.47 $\pm$ 0.03  | 0.41 $\pm$ 0.02  | 0.43 $\pm$ 0.02  | 0.46 $\pm$ 0.02  | 0.46 $\pm$ 0.06   | 0.45 $\pm$ 0.01  |
| P        | (ppm)           | 0.12 $\pm$ 0.01  | 0.12 $\pm$ 0.01  | 0.14 $\pm$ 0.02  | 0.14 $\pm$ 0.01  | 0.16 $\pm$ 0.01  | 0.23 $\pm$ 0.02  | 0.13 $\pm$ 0.01  | 0.18 $\pm$ 0.01  | 0.24 $\pm$ 0.02   | 0.17 $\pm$ 0.01  |
| K        | (cmol/kg)       | 0.9 $\pm$ 0.33   | 0.66 $\pm$ 0.28  | 0.82 $\pm$ 0.28  | 1.79 $\pm$ 1.12  | 1.66 $\pm$ 0.86  | 0.88 $\pm$ 0.3   | 0.8 $\pm$ 0.17   | 1.44 $\pm$ 0.47  | 0.47 $\pm$ 0.09   | 1.03 $\pm$ 0.22  |
| Na       | (cmol/kg)       | 1.36 $\pm$ 0.42  | 1.27 $\pm$ 0.44  | 1.59 $\pm$ 0.63  | 1.96 $\pm$ 1.1   | 2.1 $\pm$ 1.24   | 1.66 $\pm$ 0.66  | 1.41 $\pm$ 0.28  | 1.9 $\pm$ 0.58   | 0.44 $\pm$ 0.06   | 1.48 $\pm$ 0.28  |
| Ca       | (cmol/Kg)       | 7.79 $\pm$ 2.34  | 8.05 $\pm$ 2.73  | 8.68 $\pm$ 2.62  | 13.93 $\pm$ 6.44 | 27.86 $\pm$ 9.64 | 50.1 $\pm$ 8.02  | 8.17 $\pm$ 1.44  | 30.63 $\pm$ 5.21 | 51.64 $\pm$ 11.48 | 24 $\pm$ 3.28    |
| Sand     | %               | 33.83 $\pm$ 1.91 | 32.50 $\pm$ 3.28 | 35.33 $\pm$ 2.89 | 41.83 $\pm$ 5.01 | 42.08 $\pm$ 4.21 | 38 $\pm$ 2.66    | 33.89 $\pm$ 1.56 | 40.64 $\pm$ 2.31 | 44.25 $\pm$ 1.56  | 38.26 $\pm$ 1.28 |
| Clay     | %               | 39.3 $\pm$ 3.01  | 42 $\pm$ 2.77    | 42.83 $\pm$ 2.47 | 35.83 $\pm$ 3.77 | 29 $\pm$ 1.99    | 32.83 $\pm$ 2.85 | 41.39 $\pm$ 1.57 | 32.56 $\pm$ 1.73 | 24.50 $\pm$ 3.42  | 35.19 $\pm$ 1.27 |
| Silt     | %               | 26.83 $\pm$ 2.37 | 25.5 $\pm$ 2.18  | 21.83 $\pm$ 1.42 | 22.33 $\pm$ 2.10 | 28.92 $\pm$ 3.04 | 29.17 $\pm$ 2.08 | 24.72 $\pm$ 1.19 | 26.8 $\pm$ 1.47  | 31.25 $\pm$ 3.17  | 26.55 $\pm$ 0.95 |

Com (large-scale commercial paddies), Shd (smallholder paddies), Uncul (natural wetland). You (young), Har (harvest/mature), Fal (fallow) crop stages.
